# Supplementary material
Source: publisher site journal article supplement (https://oneecosystem.pensoft.net/article/download/suppl/5716708/)
Supplement: Supplementary file 1

*[Tab. D: Detailed matrix of pre- and post-use of settlement and transportation areas in Germany in the period 2013-2018 in hectare per day (ha/d). (data source: IOER)]*

|  | | Settlement and transport area* | | | | |
| --- | --- | --- | --- | --- | --- | --- |
| Built-up area | Transport area | Urban open space | Sums | |
| Open space* | Agriculture | 55,7 | 8,3 | 6,6 | 70,6 | |
| -14,7 | -4,4 | -3,7 | -22,8 | |
| Forest and Copes | 7,6 | 6,6 | 3,7 | 17,9 | |
| -5,9 | -4,6 | -3,8 | -14,3 | |
| Other | 5,9 | 2,3 | 1,5 | 9,7 | |
| -4,9 | -1,6 | -1,1 | -7,5 | |
| Sums | 69,1 | 17,2 | 11,8 | **Netto +53.6** | |
| -25,4 | -10,5 | -8,7 |
| * Positive Values (+): Conversion from open space to settlement and transportation area; negative Values (−):Conversion from settlement and transportation area to open space | | | | | |
